# Supplementary material for: Methotrexate and Rheumatoid Arthritis: Current Evidence Regarding Subcutaneous Versus Oral Routes of Administration
Source: PubMed Central journal article supplement — Adv Ther. 2016 Feb 4;33(3):369–78. doi: 10.1007/s12325-016-0295-8 (PMC4833794; doi:10.1007/s12325-016-0295-8), 2016-02-04
Supplement: 12325_2016_295_MOESM1_ESM.pdf [file 12325_2016_295_MOESM1_ESM.pdf]

## *Why carry out this study?*

- Methotrexate (MTX), the current drug of choice for treating rheumatoid arthritis (RA), can be administered both orally and parenterally.
- Differences in bioavailability between formulations can effect the efficacy and tolerability of MTX, impacting effective management of patients with RA.
- This review examined available evidence regarding pharmacological characteristics and corresponding clinical effects of oral and subcutaneous MTX in patients with RA.

## *What was learned from the study?*

- The choice of MTX route of administration is a fundamental parameter for optimizing RA treatment.
- Subcutaneous MTX is characterized by higher bioavailability, greater clinical efficacy, and better tolerability than oral MTX
- The subcutaneous route of administration appears to be the best treatment option for patients with RA, in terms of risk:benefit ratio compared with the oral route, with suggested cost savings by delaying the need for more expensive biologic therapies.

This summary slide represents the opinions of the authors. The article publication charges for this publication were funded by Alfa Wassermann, Italy. Native English and technical editing of this manuscript was performed by Andrea Bothwell on behalf of Springer Healthcare Communications, and was funded by Alfa Wassermann. For a full list of acknowledgments and disclosures for all authors of this article, please see the full text online. © The Author(s) 2016. Creative Commons Attribution Noncommercial License (CC BY-NC).
